# Supplementary material
Source: PubMed Central journal article supplement (PMC4182139)

## Supplemental Information

### Supplemental Figure Legends

#### Figure S1: Purified proteins and localization of Sec7-GFP in mutant strains. (Related to Figure 1)

**(A)** 15% SDS-PAGE gel of 0.5  $\mu\text{g}$  of each purified GTPase. The faster-migrating species in some of the preparations is likely due to proteolysis at the N-terminus, consistent with the disordered N-terminus of yeast Ypt31 (Ignatev et al., 2008).

**(B)** 8% SDS-PAGE gel of 1.5  $\mu\text{g}$  of each purified Sec7 construct.

**(C)** anti-His immunoblot of purified GTPases.

**(D)** anti-His immunoblot of purified GEF constructs before and after TEV cleavage to remove the 6xHis tag (pre-TEV sample for Sec7 $\Delta$ C+HDS1 not shown).

**(E)** Localization of an extra copy of GFP-Sec7 in yeast strains harboring the indicated gene deletions or temperature-sensitive mutations. Of the 20 strains tested, the mutants with at least partial cytoplasmic mis-localization are: *ypt1-3*, *arf1 $\Delta$* , *arl3 $\Delta$* , *sys1 $\Delta$* , *trs33 $\Delta$* , *trs85 $\Delta$* , *ypt6 $\Delta$* , and *gyp6 $\Delta$* . Certain strains exhibited a brighter GFP-Sec7 signal (*arl1 $\Delta$* , *arl3 $\Delta$* , *drs2 $\Delta$* , *gyp2 $\Delta$* , *gmh1 $\Delta$* , *sys1 $\Delta$* , *syt1 $\Delta$* ) presumably due to upregulated expression. Although knockdown of Arl1 in metazoan cells results in mislocalization of BIG1/2 (Christis and Munro, 2012), GFP-Sec7 is not significantly mislocalized to the cytoplasm in *arl1 $\Delta$*  yeast cells. This result was also observed previously (Setty et al., 2004).

**(F)** Co-localization analysis with Sys1-DsRed confirms that the GFP-Sec7 punctae correspond to Golgi compartments. Sys1 is a resident Golgi transmembrane protein that partially co-localizes with Sec7, but some DsRed signal is also visible in the cytoplasm (presumably due to partial proteolysis of the fusion protein) and the vacuole. The GFP channel in (F) and (G) is shown at different light levels compared to (E), for clarity of colocalization.

**(G)** Same as in (F), for GFP-tagged Sec7 alleles after 30 min at 37°C. Note that Sys1 appears to accumulate in enlarged structures after perturbation of Sec7 function, especially in the GFP-*sec7-1* strain.

**Figure S2: In vitro assay data and controls. (Related to Figure 3)**

- (A) Example fluorescence trace of Arf1 activation by Sec7<sub>f</sub> in the presence of activated Ypt1. Insets, from left to right: Ypt1 activation by EDTA-triggered nucleotide exchange, Sec7<sub>f</sub> membrane recruitment and stimulation by activated Ypt1, and Arf1 activation by Sec7<sub>f</sub>. Liposomes and buffer are present from the beginning of the trace.
- (B) Arf1 activation rates by Sec7<sub>f</sub> in the presence of activated of Rab GTPases at various concentrations. n=3-5.
- (C) Summary table of GEF activity assay results.
- (D) Comparison of Arf1 activation by Sec7<sub>f</sub> in the presence of 100 nM activated Ypt31 or Ypt32. n=4.
- (E) Arf1 activation by Sec7<sub>f</sub> in the presence of either 50 nM activated Ypt1, 50nM Ypt31, 50nM each of Ypt1 and Ypt31 (added simultaneously to the same population of liposomes), or 100nM of Ypt31. n=3.
- (F) Arf1 activation by Sec7<sub>f</sub> in the presence of either 250 nM activated Arl1, 250nM Ypt1, 250 nM each of Arl1 and Ypt1 (added simultaneously to the same population of liposomes), 500 nM Arl1, or 500 nM Ypt1. n=3.
- (G) Comparison of Arf1 activation by Sec7<sub>f</sub> or membrane-anchored his-Sec7<sub>f</sub>. n=3.
- In (B, D-G), error bars represent 95% CIs for the indicated n.

**Figure S3: Fluorescence quantitation of time-lapse imaging and controls. (Related to Figure 4)**

- (A) Normalized fluorescence plotted versus time for the timelapses shown in Figure 4E.
- (B) The same for timelapses shown in Figure 4D.
- (C) Immunoblots to show expression levels of GFP-tagged Rab proteins relative to endogenous levels. The strain with GFP-Ypt31 integrated at the *YPT31* locus (CFY1805, which preserves the endogenous *YPT31* gene) was used to generate the data presented in Figure 4, Figure S3A, and Movie S2. G6PDH (Zwf1) serves as a loading control.
- (D) Sec7 peak-to-peak times for strains with GFP-Ypt31 on a low expression plasmid, GFP-Ypt31 integrated at the *YPT31* locus, and GFP-Ypt32 integrated at the *URA3* locus. Error bars represent s.e.m for n=3 to 5.
- (E) Sec7 peak-to-disappearance times are plotted indicating mean (26.6 seconds) and s.e.m. for 26 measurements.

(F) Average disappearance time versus average maximum fluorescence intensity for cargos.

**Figure S4: Disruption of Ypt31/32 function results in a similar, but distinct, cargo-sorting phenotype compared to lowering Golgi Arf levels. (Related to Figure 4)**

(A) Images showing Kex2-GFP overlapping significantly with the TGN (marked by Sec7-6xDsRed) in wild-type cells. Virtually all TGN localization of Kex2 is lost in both *ypt31-101 ypt32Δ* and *arf1Δ* cells (*S. cerevisiae* possesses two highly homologous Golgi-localized Arf proteins, Arf1 and Arf2. The *arf1Δ* strain expresses ~10% of Arf1/2 relative to wild-type cells (Stearns et al., 1990)). Imaging was performed at 26°C for all strains.

(B) GFP-Snc1 localization to the PM is diminished in *ypt31-101 ypt32Δ* cells, but not significantly mislocalized in *arf1Δ* cells.

(C) GFP-Tlg1 displays increased localization to the vacuole in *ypt31-101 ypt32Δ*. In *arf1Δ* cells, there is slight mislocalization of Tlg1 to the vacuole, but a significant portion remains TGN-localized.

(D) The significant portion of GFP-Tlg1 localizing to the TGN in *arf1Δ* cells allowed us to measure the sorting dynamics of GFP-Tlg1 in this mutant compared to wild-type cells. Error bars represent s.e.m. for n=5 (mutant) or n=4 (wild-type).

(E) Context for the main findings of this study: a schematic of the Golgi complex, showing major outgoing and incoming trafficking pathways (solid arrows), and the key GTPases. Blue-labeled GTPases regulate the tethering of incoming vesicles. Green-labeled GTPases regulate formation of outgoing vesicles. Magenta-labeled Arf1 represents the inactive form, which must be activated (dashed arrow) by its GEF, Sec7, at the TGN. Prior to this study, the Ypt31/32 Rab proteins had an unknown role in vesicle formation.

(F) The major finding of this study, that four GTPases differentially regulate Sec7. We propose that Sec7 is regulated by a two-stage process in which initial recruitment of Sec7 relies upon three GTPases, and subsequent activation requires the Ypt31/32 GTPase. In the absence of incoming traffic, we expect the signals from Ypt1 and Arl1 will be lower, thus dampening recruitment and activation of Sec7. It remains unknown how activation of Ypt31/32 is regulated.

**Figure S1**

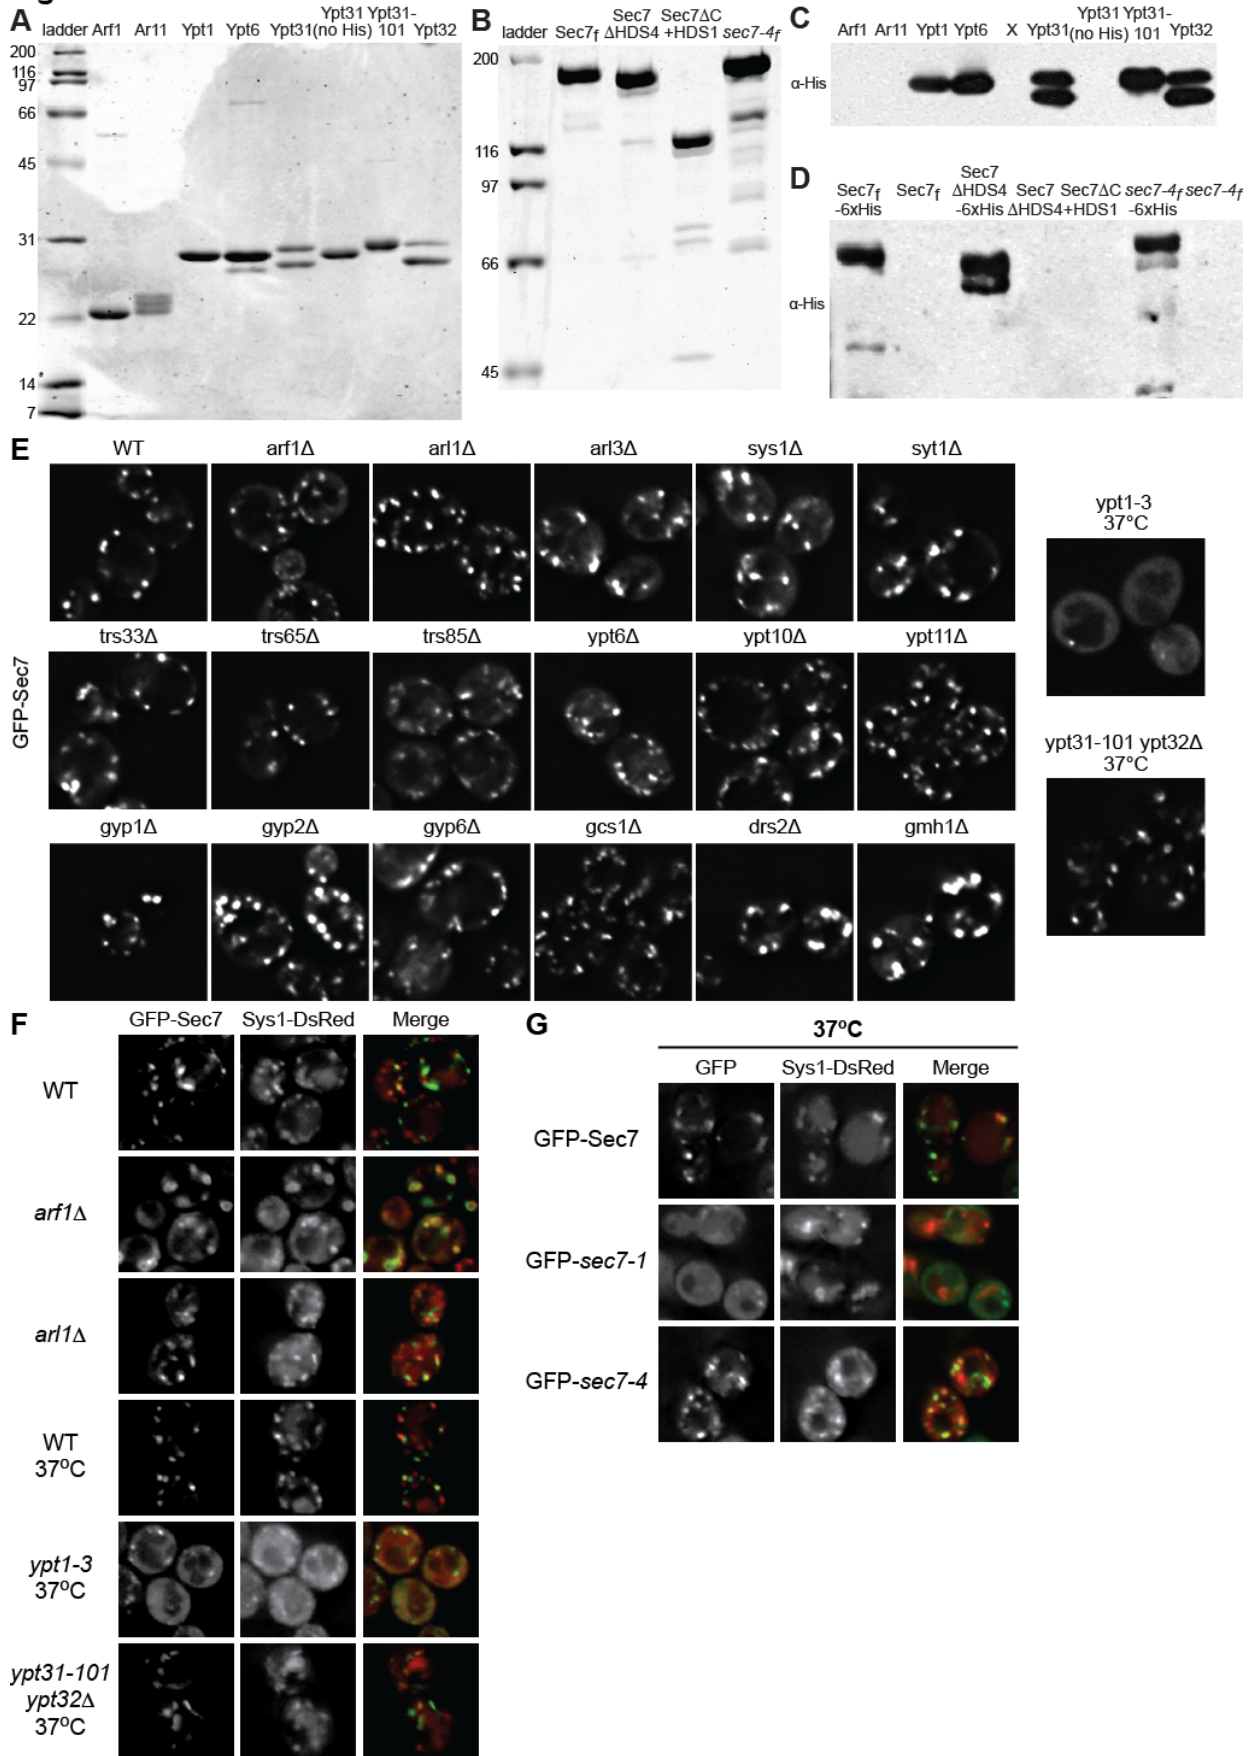

**Figure S2**

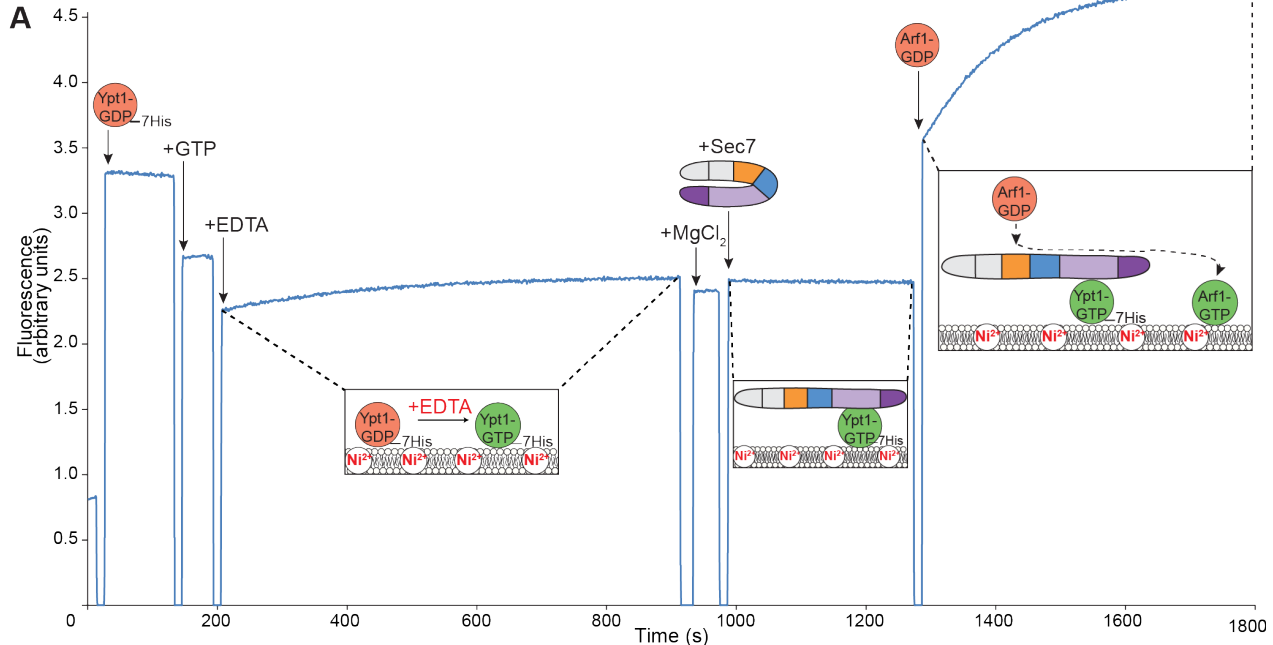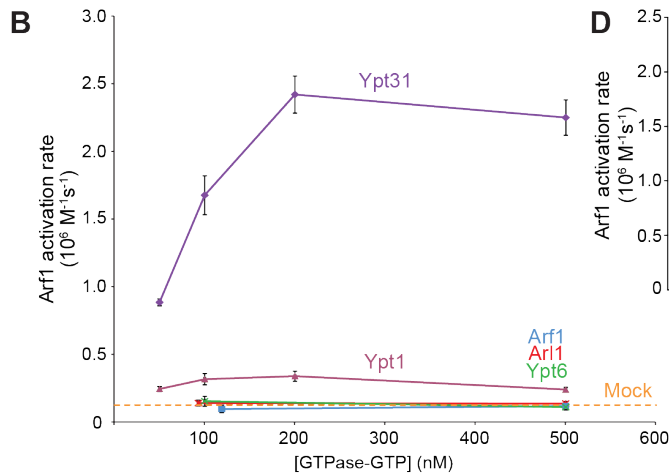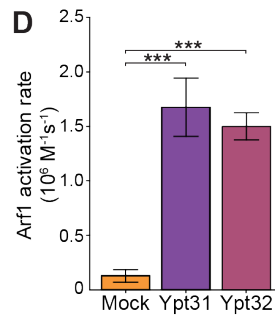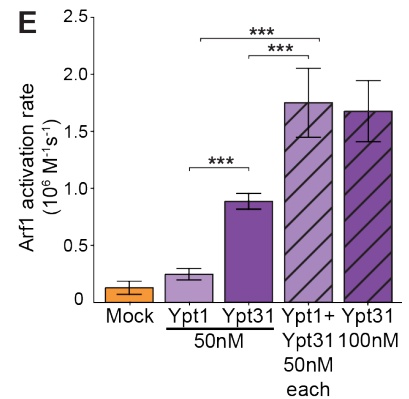

**C Summary of Sec7 GEF activity assays**  
GTPase at 600 nM unless otherwise indicated

| Construct   | Experiment                             | Result            |
|-------------|----------------------------------------|-------------------|
| Sec7f       | Stimulation by Arf1                    | none              |
|             | Stimulation by Arl1                    | none              |
|             | Stimulation by Ypt1                    | 2-fold            |
|             | Stimulation by Ypt6                    | none              |
|             | Stimulation by Ypt31                   | 20-fold at 500 nM |
|             |                                        | 13-fold at 100 nM |
|             |                                        | 12-fold at 100 nM |
| Sec7ΔHDS4   | Increase in activity relative to Sec7f | 5-fold            |
|             | Stimulation by Arf1                    | 3.5-fold          |
|             | Stimulation by Arl1                    | 2.5-fold          |
|             | Stimulation by Ypt1                    | none              |
| Sec7ΔC+HDS1 | Increase in activity relative to Sec7f | 4-fold            |
|             | Stimulation by Arf1                    | 3-fold            |
|             | Stimulation by Arl1                    | 2-fold            |
|             | Stimulation by Ypt1                    | none              |
| 6xHis-Sec7f | Increase in activity relative to Sec7f | 1.5-fold          |
|             | Stimulation by Ypt1                    | 2-fold            |
|             | Stimulation by Ypt31                   | 10-fold           |

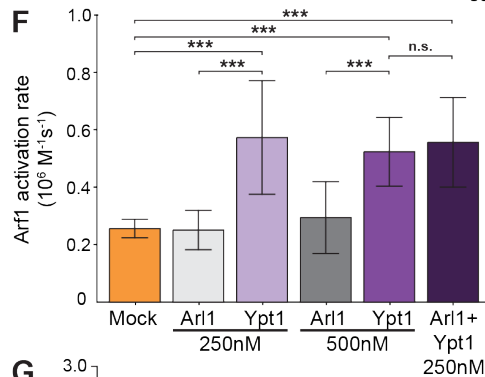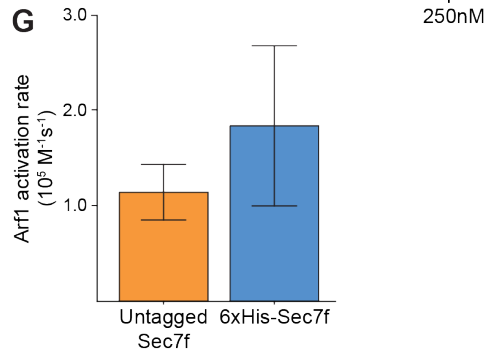

**Figure S3**

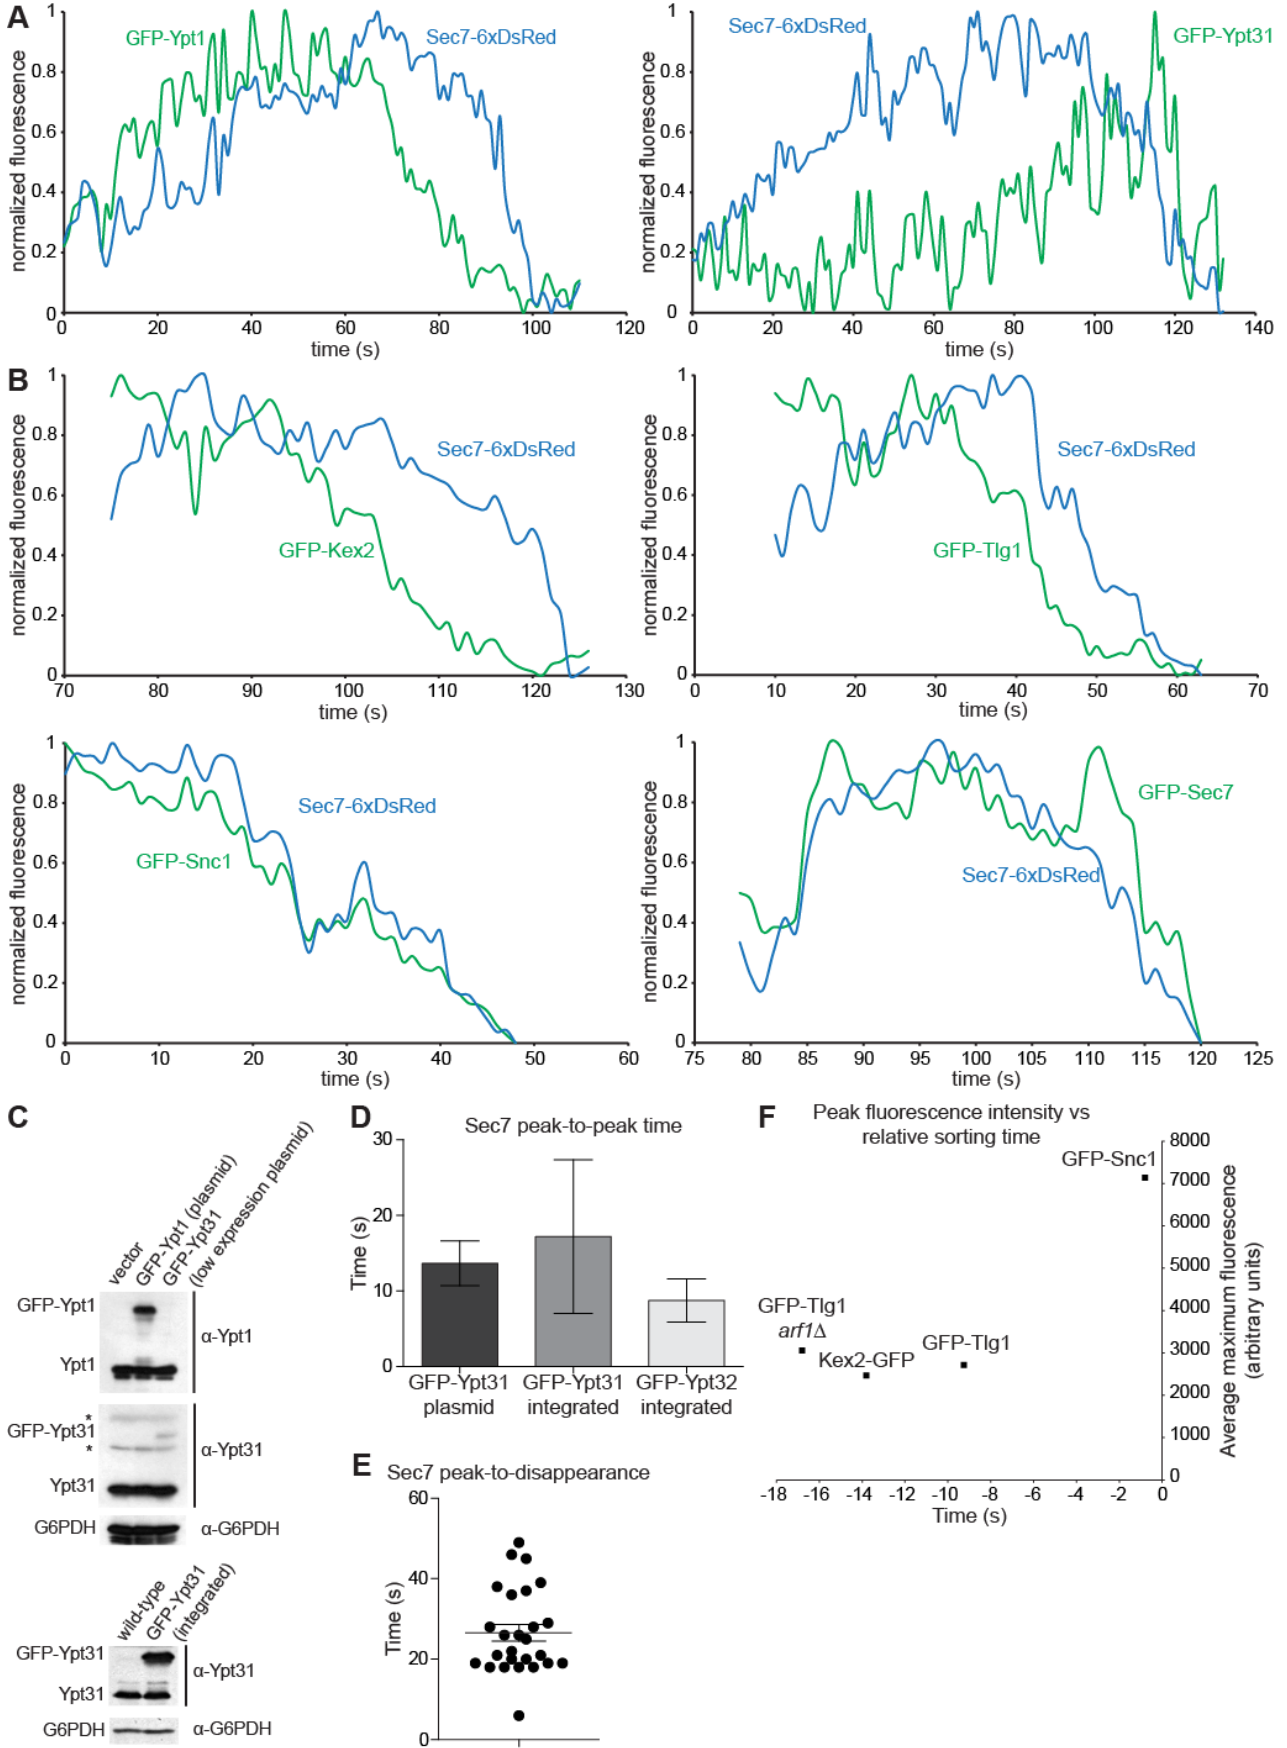



**Figure S4**

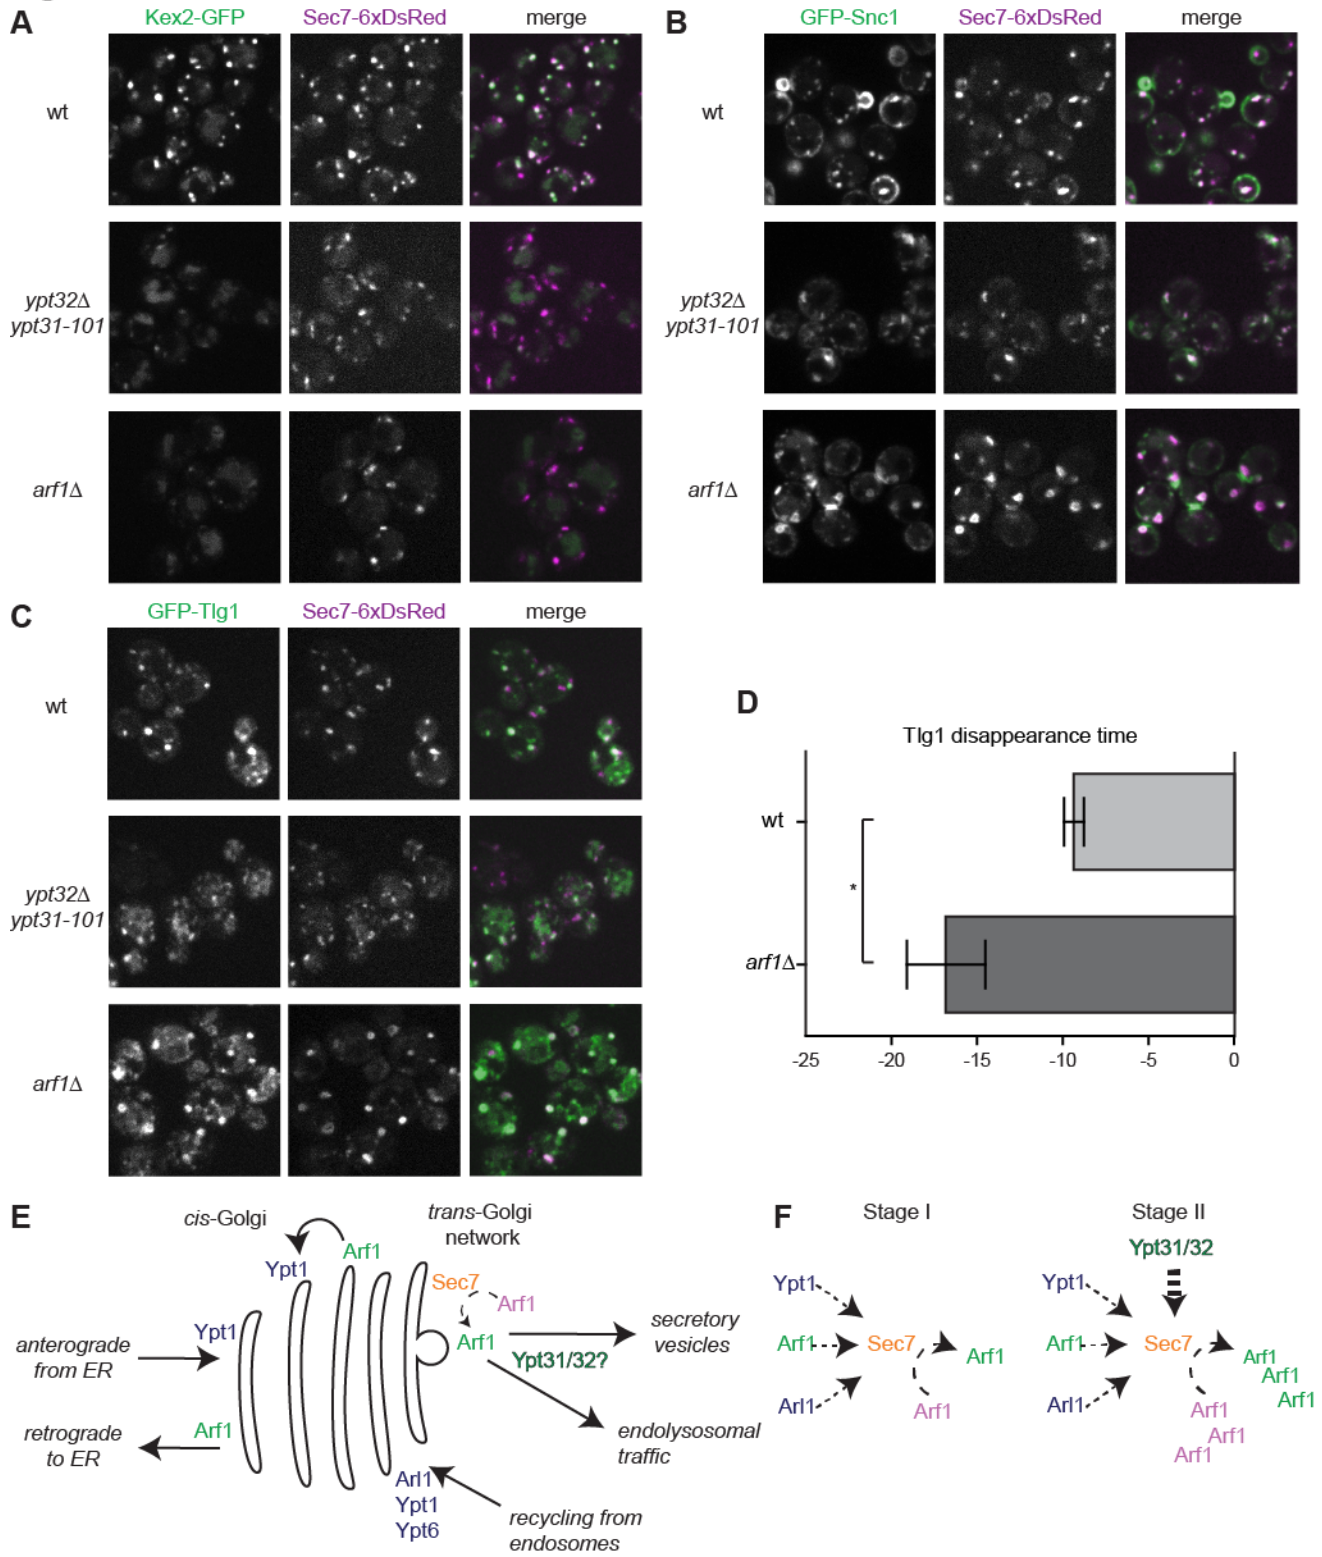

Supplement: NIHMS616135-supplement-01.pdf [file NIHMS616135-supplement-01.pdf]
