# Supplementary material
Source: PubMed Central journal article supplement (PMC4182139)
Supplement: NIHMS616135-supplement-05.pdf [file NIHMS616135-supplement-05.pdf]

## **Supplemental Movie Legends**

### **Movie S1: Sec7-labeled TGN compartments disintegrate into smaller structures (Related to Figure 4A)**

Time-lapse movie of a GFP-Sec7 strain (CFY1037). Single focal-plane images were acquired every second. The movie plays at 5 fps, which is 5X real-time.

### **Movie S2: Sec7 follows Ypt1 and precedes Ypt31 at the Golgi. (Related to Figure 4E)**

Two time-lapse movies in series: 1) a Sec7-6xDsRed, GFP-Ypt1 strain (CFY1689+GFP-Ypt1); 2) a Sec7-6xDsRed, GFP-Ypt31 strain (CFY1805). Single focal-plane images were acquired every second. The movies play at 10 fps, which is 10X real-time.

### **Movie S3: Imaging cargo sorting events relative to Sec7 disappearance (Related to Figure 4D)**

Four time-lapse movies in series: 1) a Sec7-6xDsRed, GFP-Sec7 strain (CFY1681+pCF1084) used as a control; 2) a Sec7-6xDsRed, GFP-Snc1 strain (CFY1711) shows coincident disappearance of Snc1 and Sec7; 3) a Sec7-6xDsRed, Kex2-GFP strain (CFY1690) shows Kex2 is sorted before Sec7 disappearance; 4) a Sec7-6xDsRed, GFP-Tlg1 strain (CFY1689+GFP-Tlg1) shows Tlg1 is sorted before Sec7 disappearance. Single focal-plane images were acquired every second. The movies play at 5 fps, which is 5X real-time.

## Supplemental Experimental Procedures

### Plasmid constructs

Plasmids were constructed using standard techniques and are described below.

### Yeast strains and genetic methods

Strains were generated by standard techniques and are described below.

### Antibodies

The anti-Ypt1 (Preuss et al., 1992) and anti-Ypt31 (Jedd et al., 1997) antisera used for Figure S3C were gifts from N. Segev. The anti-G6PDH antibody was purchased from Sigma (A9521).

### Protein purification

As reported previously, removal of the first 202 residues of Sec7 greatly improved protein expression, and did not compromise the essential function(s) of the protein (Richardson et al., 2012). Purification of Sec7<sub>f</sub> and Sec7 $\Delta$ C+HDS1 constructs were as previously described (Richardson et al., 2012), with the addition of treatment by TEV-protease to remove the 6xHis-tag prior to the final chromatography step. Removal of the tag was confirmed by immunoblot (Figure S1D). The sec7-4<sub>f</sub> and Sec7 $\Delta$ HDS4 constructs were purified using the same procedure as Sec7<sub>f</sub>. We were not able to purify a well-behaved construct for the HDS2-3 domain region. In our experience the conserved N-terminal domains of Sec7 appear to be required for expression and purification of truncation constructs. Myristoylated Arf1 was purified as reported (Ha et al., 2005).

C-terminal 7xHis-tagged yeast Rab protein expression constructs were created using the pGEX-6P vector backbone. Constructs were designed so that the C-terminal cysteine residues (prenylated *in vivo*) were replaced with a 7xHis-tag for membrane anchoring. The expression vectors were transformed into Rosetta2 (Novagen) *E. coli* cells and grown in 1-2L TB at 37°C to an OD of ~3.0. The temperature was then decreased to 18°C, expression was induced with 500  $\mu$ M IPTG, and cells were grown overnight. Cells were lysed by sonication in lysis buffer containing 1xPBS, 2 mM MgCl<sub>2</sub>, and 5 mM  $\beta$ -Me. The lysate was centrifuged, and protein was purified from the cleared lysate by glutathione resin (G Biosciences) followed by cleavage with PreScission protease overnight at 4°C in a buffer containing 50 mM Tris-HCl pH

7.5, 150 mM NaCl, 1 mM EDTA, 2 mM MgCl<sub>2</sub>, and 5 mM β-Me. The eluate containing the purified protein was then collected and exchanged into a buffer containing 20 mM Tris-HCl pH 8, 100 mM NaCl, 2 mM MgCl<sub>2</sub>, and 1 mM DTT before use in GEF activity assays. We note that there are two distinct species in some of the purifications. Analysis by anti-His-tag immunoblot indicated that the faster migrating species are likely N-terminal proteolytic products (Figure S1C). The structure of yeast Ypt31 demonstrated that the N-terminal nine amino acids are disordered (Ignatev et al., 2008).

For purification of myristoylated Arl1, a plasmid encoding full-length yeast Arl1 was introduced into BL21(DE3) *E. coli* cells together with the Nmt1 plasmid encoding the N-myristoyl transferase enzyme. Growth and expression was the same as for Arf1. Following cell lysis (in 15 mL lysis buffer per 1 liter cell pellet: 25 mM Tris pH 7.5, 100 mM NaCl, 1 mM MgCl<sub>2</sub>, 10 mM βME, 1 mM PMSF) by sonication, the lysate was clarified by centrifugation. The supernatant was incubated with SP-sepharose (GE Healthcare) resin (1 ml resin per 7 mg protein in lysate). The unbound fraction was applied to a MonoQ column (GE Healthcare), and a 100 mM to 1 M NaCl gradient (25 mM Tris pH 8.0, 2 mM MgCl<sub>2</sub>, 1 mM DTT) was run. Peak fractions were pooled and run on a Superdex 200 column (GE Healthcare). Peak fractions were then run on a HiTrap Phenyl column (GE Healthcare), using a 3 M to 0 M NaCl gradient (20 mM Tris pH 8.0, 2 mM MgCl<sub>2</sub>, 1 mM DTT). We note that the purified protein runs as three species on an SDS-PAGE gel.

### **Liposome flotation (binding) assays**

Flotation assays were prepared as described (Richardson et al., 2012), using 4 ug of each protein and 0.3 mM of liposomes per 75 ul binding reaction. The His-tags at the C-termini of the Rab proteins allow these proteins to be bound to the liposomes regardless of their activation state. In contrast, the Arf1 and Arl1 proteins only bind to liposomes when activated, due to a conformational change that exposes an N-terminal membrane-inserting helix. 15% PAGE gels were stained with IRDye (Li-Cor) and imaged on a Li-Cor Odyssey instrument. Gel images were processed with the ImageJ despeckle filter and min/max levels were adjusted in Photoshop for clarity.

## **GEF activity assays**

Tryptophan fluorescence GEF assays were performed at 30°C as described (Richardson et al., 2012). See Figure S2A for an example of a single full experiment. Unless otherwise indicated, most assays were performed with 500 nM GTPase activators, 30 nM GEF construct, and 400 nM myrArf1-GDP substrate. Assays in Figure 2C,D used 100nM GEF construct. Assays in Figures 3C and S2B,D,E used either 100 nM GTPase activator or the concentration specified in the figure and 50 nM GEF construct. Liposomes batches were pooled, and the same pool was used for all GEF assays, except for those in Figures 3C and S2B,D,E, which were performed with a separate pool of liposomes.

## **Microscopy**

See below for which strains and plasmids were used for each experiment.

## Plasmids used in this study

| Name         | Description                                                                                    | Source                      |
|--------------|------------------------------------------------------------------------------------------------|-----------------------------|
| pNmt1        | Nmt1 (S. ce.) in pCYC plasmid                                                                  | (Duronio et al., 1990)      |
| pArf1        | Arf1 (S. ce.) in pET3c                                                                         | (Weiss et al., 1989)        |
| pCF1184      | Arl1 (S. ce.) in pET23                                                                         | this study                  |
| Ypt1-7His    | Ypt1 with C-terminal his-tag and cleavable GST-fusion in pGEX-6P                               | T. Bretscher                |
| pCM14        | Ypt6 with C-terminal his-tag and cleavable GST-fusion in pGEX-6P                               | this study                  |
| pCM15        | Ypt31 with C-terminal his-tag and cleavable GST-fusion in pGEX-6P                              | this study                  |
| pCM16        | Ypt31 "soluble" (no his-tag) with cleavable GST-fusion in pGEX-6P                              | this study                  |
| pCM17        | <i>ypt31-101</i> with C-terminal his-tag and cleavable GST-fusion in pGEX-6P                   | this study*                 |
| Ypt32-7His   | Ypt32 with C-terminal his-tag and cleavable GST-fusion in pGEX-6P                              | T. Bretscher                |
| pBCR314      | 6xHis-Sec7 <sub>f</sub> (residues 203-2009) in pFastBacHT                                      | (Richardson et al., 2012)   |
| pBCR389      | 6xHis-Sec7 $\Delta$ C+HDS1 (residues 203-1220) in pET28                                        | (Richardson et al., 2012)   |
| pCM18        | 6xHis-Sec7 $\Delta$ HDS4 (residues 203-1799) in pFastBacHT                                     | this study                  |
| pCF1257      | 6xHis-sec7-4 <sub>f</sub> (residues 203-2009, G883D) in pFastBacHT                             | this study                  |
| pRS304       | yeast integration vector with <i>TRP1</i> marker                                               | (Sikorski and Hieter, 1989) |
| pRS305       | yeast integration vector with <i>LEU2</i> marker                                               | (Sikorski and Hieter, 1989) |
| pRS415       | yeast centromeric plasmid with <i>LEU2</i> marker                                              | (Sikorski and Hieter, 1989) |
| pRS416       | yeast centromeric plasmid with <i>URA3</i> marker                                              | (Sikorski and Hieter, 1989) |
| pRS426       | yeast 2-micron (high copy) vector with <i>URA3</i> marker                                      | (Sikorski and Hieter, 1989) |
| pCF1043      | <i>SEC7</i> (includes ~1 kB of 5'UTR) in pRS416                                                | (Richardson et al., 2012)   |
| pCF1084      | GFP-Sec7 driven by <i>P<sub>SEC7</sub></i> in pRS415                                           | (Richardson et al., 2012)   |
| pCF1105      | GFP-sec7-1 driven by <i>P<sub>SEC7</sub></i> in pRS415                                         | this study                  |
| pCF1106      | GFP-sec7-4 driven by <i>P<sub>SEC7</sub></i> in pRS415                                         | this study                  |
| pCF1191      | GFP-Sec7 (driven by <i>P<sub>SEC7</sub></i> ) integration plasmid in pRS305                    | this study                  |
| pCF1197      | GFP-sec7-1 (driven by <i>P<sub>SEC7</sub></i> ) integration plasmid in pRS305                  | this study                  |
| pCF1246      | RFP <sup>MARS</sup> -sec7-4 (driven by <i>P<sub>SEC7</sub></i> ) integration plasmid in pRS304 | this study                  |
| pCF1258      | <i>SEC7</i> gene in pRS426                                                                     | this study                  |
| VS284        | <i>YPT31</i> gene in pRS426                                                                    | (Sciorra et al., 2005)      |
| pCF1259      | <i>ARL1</i> gene in pRS426                                                                     | this study                  |
| pCF1261      | <i>ARF1</i> gene in pRS426                                                                     | this study                  |
| pCF1263      | <i>YPT1</i> gene in pRS426                                                                     | this study                  |
| GFP-Tlg1     | GFP-Tlg1 in pRS416                                                                             | (Xu et al., 2013)           |
| GFP-Ypt1     | GFP-Ypt1 in pRS415                                                                             | (Buvelot Frei et al., 2006) |
| VS2311       | GFP-Ypt31 in pRS415                                                                            | (Sciorra et al., 2005)      |
| GFP-Snc1     | GFP-Snc1 integration plasmid in pRS306                                                         | (Lewis et al., 2000)        |
| pRC678       | GFP-Ypt31 integration plasmid in pRS306                                                        | (Buvelot Frei et al., 2006) |
| pRC679       | GFP-Ypt32 integration plasmid in pRS306                                                        | (Buvelot Frei et al., 2006) |
| Sec7-6xDsRed | Sec7-6xDsRed integration plasmid ( <i>URA3</i> )                                               | (Losev et al., 2006)        |
| Sys1-DsRed   | Sys1-DsRed in pRS416                                                                           | T. Graham                   |

\*The *ypt31-101* mutation was originally reported in (Sciorra et al., 2005). This allele has the following mutations: K43R, K127N

## Yeast strains used in this study

| Name      | Description                                                                                     | (Strain construction method)                   | Source                    |
|-----------|-------------------------------------------------------------------------------------------------|------------------------------------------------|---------------------------|
| SEY6210   | <i>MATa his3-Δ200 leu2-3,112 lys2-801 trp1-Δ901 ura3-52 suc2-Δ9</i>                             |                                                | (Robinson et al., 1988)   |
| SEY6210.1 | <i>MATa his3-Δ200 leu2-3,112 lys2-801 trp1-Δ901 ura3-52 suc2-Δ9</i>                             |                                                | (Robinson et al., 1988)   |
| BY4741    | <i>MATa his3-Δ1 leu2-Δ0 met15-Δ0 ura3-Δ0</i>                                                    |                                                | (Brachmann et al., 1998)  |
| BY4742    | <i>MATa his3-Δ1 leu2-Δ0 lys2-Δ0 ura3-Δ0</i>                                                     |                                                | (Brachmann et al., 1998)  |
| BYgeneΔ   | <i>BY4741 geneΔ::KanMX</i>                                                                      |                                                | (Gaever et al., 2002)     |
| VSY468    | <i>SEY6210 ypt31-101::URA3 ypt32Δ::TRP1</i>                                                     |                                                | (Sciorra et al., 2005)    |
| CFY409    | <i>BY4742 sec7Δ::KANMX +pCF1043</i>                                                             |                                                | (Richardson et al., 2012) |
| CBY474    | <i>MATa ade2-1 can1-100 leu2-3,112 trp1-1 ura3-1 ypt1-3</i>                                     |                                                | (Cao et al., 1998)        |
| CFY1037   | <i>SEY6210 GFP-Sec7::LEU2</i>                                                                   | (integration of pCF1191 into SEY6210)          | this study                |
| CFY1111   | <i>SEY6210.1 GFP-sec7-1::LEU2</i>                                                               | (integration of pCF1197 into SEY6210.1)        | this study                |
| CFY1319   | <i>SEY6210 ypt31-101::URA3::ura3 ypt32Δ::TRP1</i>                                               | (5-FOA selection of VSY468)                    | this study                |
| CFY1499   | <i>SEY6210.1 RFP<sup>MARS</sup>-sec7-4::TRP1</i>                                                | (integration of pCF1246 into SEY6210.1)        | this study                |
| CFY1681   | <i>SEY6210.1 Sec7-6xDsRed::URA3</i>                                                             | (integration of Sec7-6xDsRed into SEY6210.1)   | this study                |
| CFY1689   | <i>SEY6210.1 Sec7-6xDsRed::URA3::ura3</i>                                                       | (5-FOA selection of CFY1681)                   | this study                |
| CFY1690   | <i>SEY6210.1 Sec7-6xDsRed::URA3 Kex2-GFP::HIS3</i>                                              | (PCR integration into CFY1681)                 | this study                |
| CFY1711   | <i>SEY6210.1 Sec7-6xDsRed::URA3::ura3 ura3::GFP-Snc1::URA3</i>                                  | (GFP-Snc1 plasmid integration into CFY1689)    | this study                |
| CFY1752   | <i>SEY6210.1 Sec7-6xDsRed::URA3 Kex2-GFP::HIS3 arf1Δ::KanMX</i>                                 | (PCR integration into CFY1690)                 | this study                |
| CFY1754   | <i>SEY6210.1 Sec7-6xDsRed::URA3::ura3 ura3::GFP-Snc1::URA3 arf1Δ::KanMX</i>                     | (PCR integration into CFY1711)                 | this study                |
| CFY1764   | <i>SEY6210.1 Sec7-6xDsRed::URA3::ura3 arf1Δ::KanMX</i>                                          | (PCR integration into CFY1689)                 | this study                |
| CFY1780   | <i>SEY6210 ypt31-101::URA3::ura3 ypt32Δ::TRP1 Sec7-6xDsRed::URA3</i>                            | (integration of Sec7-6xDsRed into CFY1319)     | this study                |
| CFY1784   | <i>SEY6210 GFP-Ypt31::URA3</i>                                                                  | (GFP-Ypt31 plasmid integration into SEY6210)   | this study                |
| CFY1786   | <i>SEY6210 ura3::GFP-Ypt32::URA3</i>                                                            | (GFP-Ypt32 plasmid integration into SEY6210)   | this study                |
| CFY1805   | <i>SEY6210 GFP-Ypt31::URA3 Sec7-6xDsRed::URA3::ura3</i>                                         | (made by mating/sporulation CFY1689 x CFY1784) | this study                |
| CFY1806   | <i>SEY6210 ura3::GFP-Ypt1::URA3 Sec7-6xDsRed::URA3::ura3</i>                                    | (made by mating/sporulation CFY1689 x CFY1786) | this study                |
| CFY1811   | <i>SEY6210 ypt31-101::URA3::ura3 ypt32Δ::TRP1 Sec7-6xDsRed::URA3::ura3</i>                      | (5-FOA selection of CFY1780)                   | this study                |
| CFY1817   | <i>SEY6210 ypt31-101::URA3::ura3 ypt32Δ::TRP1 Sec7-6xDsRed::URA3 Kex2-GFP::HIS3</i>             | (PCR integration into CFY1780)                 | this study                |
| CFY1819   | <i>SEY6210 ypt31-101::URA3::ura3 ypt32Δ::TRP1 Sec7-6xDsRed::URA3::ura3 ura3::GFP-Snc1::URA3</i> | (GFP-Snc1 plasmid integration into CFY1811)    | this study                |

## Strains and plasmids used in microscopy and growth experiments.

---

| Experiment (Figure #) | Strain(s) and plasmid(s) used                                                                              |
|-----------------------|------------------------------------------------------------------------------------------------------------|
| Figure 1C             | BY4741, BYarf1 $\Delta$ , BYarl1 $\Delta$ , SEY6210, VSY468, CBY474, each with pCF1084                     |
| Figure 1D             | CFY1111 with pRS426, pCF1258, pCF1259, pCF1261, pCF1263, or VSB284                                         |
| Figure 1E             | CFY1499 with pRS426, pCF1258, pCF1259, pCF1261, pCF1263, or VSB284                                         |
| Figure 2A             | CFY409 with shuffled pCF1084, pCF1105, or pCF1106                                                          |
| Figure 2B             | CFY1111 with pRS426 or pCF1263                                                                             |
| Figure 4A-C           | CFY1037                                                                                                    |
| Figure 4D             | CFY1681+pCF1084, CFY1711, CFY1690, CFY1689+GFP-Tlg1                                                        |
| Figure 4E             | CFY1689+GFP-Ypt1, CFY1805                                                                                  |
| Figure S1E            | CBY474, VSY468, BY4171, BYgene $\Delta$ , each with pCF1084                                                |
| Figure S1F            | BY4741, BYarf1 $\Delta$ , BYarl1 $\Delta$ , SEY6210, VSY468, CBY474, each with pCF1084 and Sys1-DsRed      |
| Figure S1G            | CFY409 with shuffled pCF1084, pCF1105, or pCF1106, each with Sys1-DsRed                                    |
| Figure S3C,D          | CFY1689+GFP-Ypt1, CFY1689+GFP-Ypt31, CFY1805, CFY1806                                                      |
| Figure S4A-D          | CFY1690, CFY1689+GFP-TLG1, CFY1711, CFY1752, CFY1754, CFY1764+GFP-Tlg1, CFY1811+GFP-Tlg1, CFY1817, CFY1819 |

---

## Supplemental References

- Brachmann, C.B., Davies, A., Cost, G.J., Caputo, E., Li, J., Hieter, P., and Boeke, J.D. (1998). Designer deletion strains derived from *Saccharomyces cerevisiae* S288C: a useful set of strains and plasmids for PCR-mediated gene disruption and other applications. *Yeast* **14**, 115-132.
- Buvelot Frei, S., Rahl, P.B., Nussbaum, M., Briggs, B.J., Calero, M., Janeczko, S., Regan, A.D., Chen, C.Z., Barral, Y., Whittaker, G.R., *et al.* (2006). Bioinformatic and comparative localization of Rab proteins reveals functional insights into the uncharacterized GTPases Ypt10p and Ypt11p. *Mol. Cell Biol.* **26**, 7299-7317.
- Cao, X., Ballew, N., and Barlowe, C. (1998). Initial docking of ER-derived vesicles requires Uso1p and Ypt1p but is independent of SNARE proteins. *EMBO J.* **17**, 2156-2165.
- Christis, C., and Munro, S. (2012). The small G protein Arl1 directs the trans-Golgi-specific targeting of the Arf1 exchange factors BIG1 and BIG2. *J. Cell Biol.* **196**, 327-335.
- Daboussi, L., Costaguta, G., and Payne, G.S. (2012). Phosphoinositide-mediated clathrin adaptor progression at the trans-Golgi network. *Nat. Cell Biol.* **14**, 239-248.
- Duronio, R.J., Jackson-Machelski, E., Heuckeroth, R.O., Olins, P.O., Devine, C.S., Yonemoto, W., Slice, L.W., Taylor, S.S., and Gordon, J.I. (1990). Protein N-myristoylation in *Escherichia coli*: reconstitution of a eukaryotic protein modification in bacteria. *Proc. Natl. Acad. Sci. USA* **87**, 1506-1510.
- Giaever, G., Chu, A.M., Ni, L., Connelly, C., Riles, L., Veronneau, S., Dow, S., Lucau-Danila, A., Anderson, K., Andre, B., *et al.* (2002). Functional profiling of the *Saccharomyces cerevisiae* genome. *Nature* **418**, 387-391.
- Ha, V.L., Thomas, G.M., Stauffer, S., and Randazzo, P.A. (2005). Preparation of myristoylated Arf1 and Arf6. *Methods Enzymol.* **404**, 164-174.
- Ignatev, A., Kravchenko, S., Rak, A., Goody, R.S., and Pylypenko, O. (2008). A structural model of the GDP dissociation inhibitor rab membrane extraction mechanism. *J. Biol. Chem.* **283**, 18377-18384.
- Jedd, G., Mulholland, J., and Segev, N. (1997). Two new Ypt GTPases are required for exit from the yeast trans-Golgi compartment. *J. Cell Biol.* **137**, 563-580.
- Lewis, M.J., Nichols, B.J., Prescianotto-Baschong, C., Riezman, H., and Pelham, H.R. (2000). Specific retrieval of the exocytic SNARE Snc1p from early yeast endosomes. *Mol. Biol. Cell* **11**, 23-38.
- Losev, E., Reinke, C.A., Jellen, J., Strongin, D.E., Bevis, B.J., and Glick, B.S. (2006). Golgi maturation visualized in living yeast. *Nature* **441**, 1002-1006.



Preuss, D., Mulholland, J., Franzusoff, A., Segev, N., and Botstein, D. (1992). Characterization of the *Saccharomyces* Golgi complex through the cell cycle by immunoelectron microscopy. *Mol. Biol. Cell* 3, 789-803.

Richardson, B.C., McDonold, C.M., and Fromme, J.C. (2012). The Sec7 Arf-GEF is recruited to the trans-Golgi network by positive feedback. *Dev. Cell* 22, 799-810.

Robinson, J.S., Klionsky, D.J., Banta, L.M., and Emr, S.D. (1988). Protein sorting in *Saccharomyces cerevisiae*: isolation of mutants defective in the delivery and processing of multiple vacuolar hydrolases. *Mol. Cell Biol.* 8, 4936-4948.

Sciorra, V.A., Audhya, A., Parsons, A.B., Segev, N., Boone, C., and Emr, S.D. (2005). Synthetic genetic array analysis of the PtdIns 4-kinase Pik1p identifies components in a Golgi-specific Ypt31/rab-GTPase signaling pathway. *Mol. Biol. Cell* 16, 776-793.

Setty, S.R., Strohlic, T.I., Tong, A.H., Boone, C., and Burd, C.G. (2004). Golgi targeting of ARF-like GTPase Arl3p requires its Nalpha-acetylation and the integral membrane protein Sys1p. *Nat. Cell Biol.* 6, 414-419.

Sikorski, R.S., and Hieter, P. (1989). A system of shuttle vectors and yeast host strains designed for efficient manipulation of DNA in *Saccharomyces cerevisiae*. *Genetics* 122, 19-27.

Stearns, T., Kahn, R.A., Botstein, D., and Hoyt, M.A. (1990). ADP ribosylation factor is an essential protein in *Saccharomyces cerevisiae* and is encoded by two genes. *Mol. Cell Biol.* 10, 6690-6699.

Weiss, O., Holden, J., Rulka, C., and Kahn, R.A. (1989). Nucleotide binding and cofactor activities of purified bovine brain and bacterially expressed ADP-ribosylation factor. *J. Biol. Chem.* 264, 21066-21072.

Xu, P., Baldrige, R.D., Chi, R.J., Burd, C.G., and Graham, T.R. (2013). Phosphatidylserine flipping enhances membrane curvature and negative charge required for vesicular transport. *J. Cell Biol.* 202, 875-886.
